# Supplementary material
Source: PubMed Central journal article supplement (PMC520776)

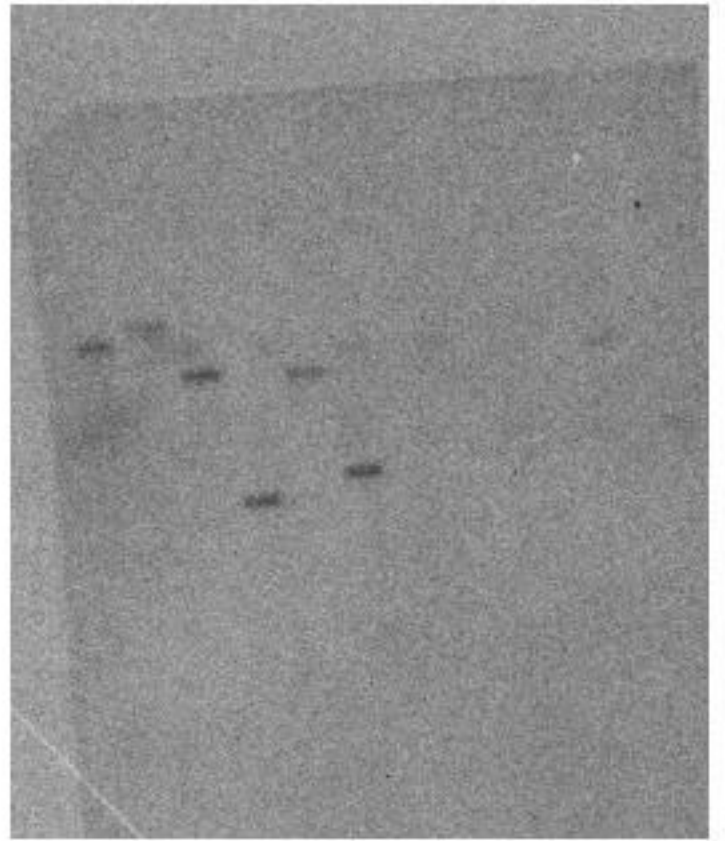

Supplement: plntphys_135_4_2046__1.pdf [file plntphys_135_4_2046__1.pdf]
